# Supplementary material
Source: PubMed Central journal article supplement (PMC7385751)

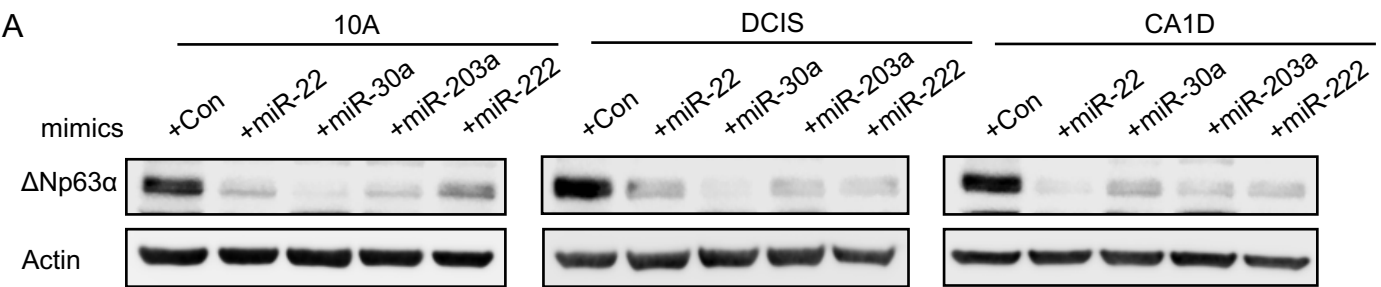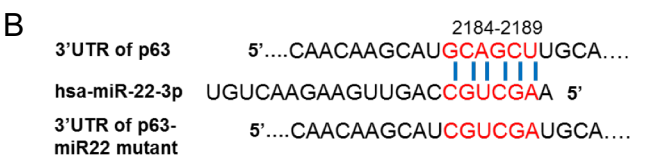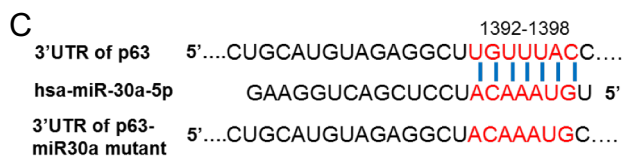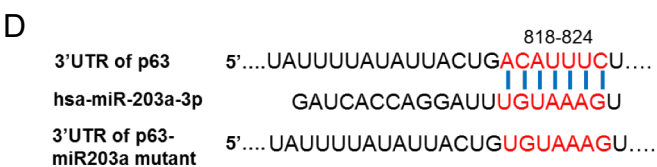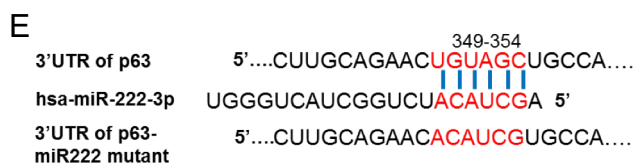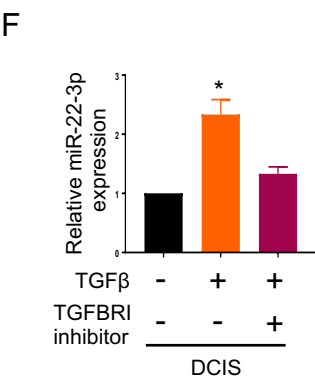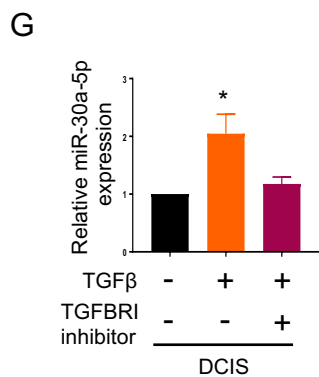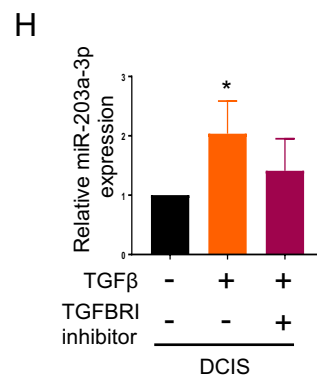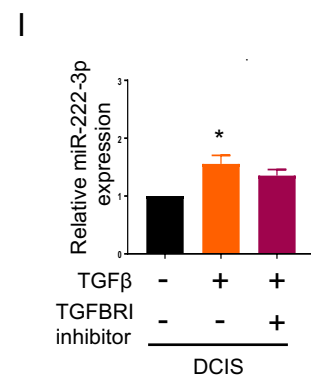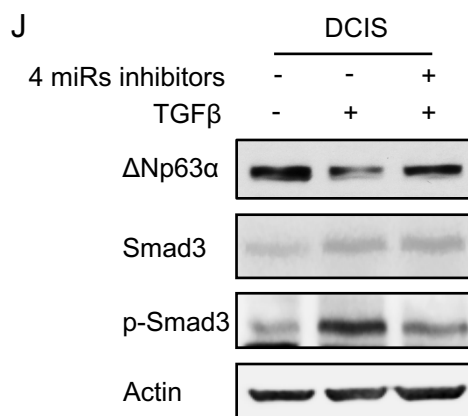

Supplement: NIHMS1587100-supplement-10.pdf [file NIHMS1587100-supplement-10.pdf]

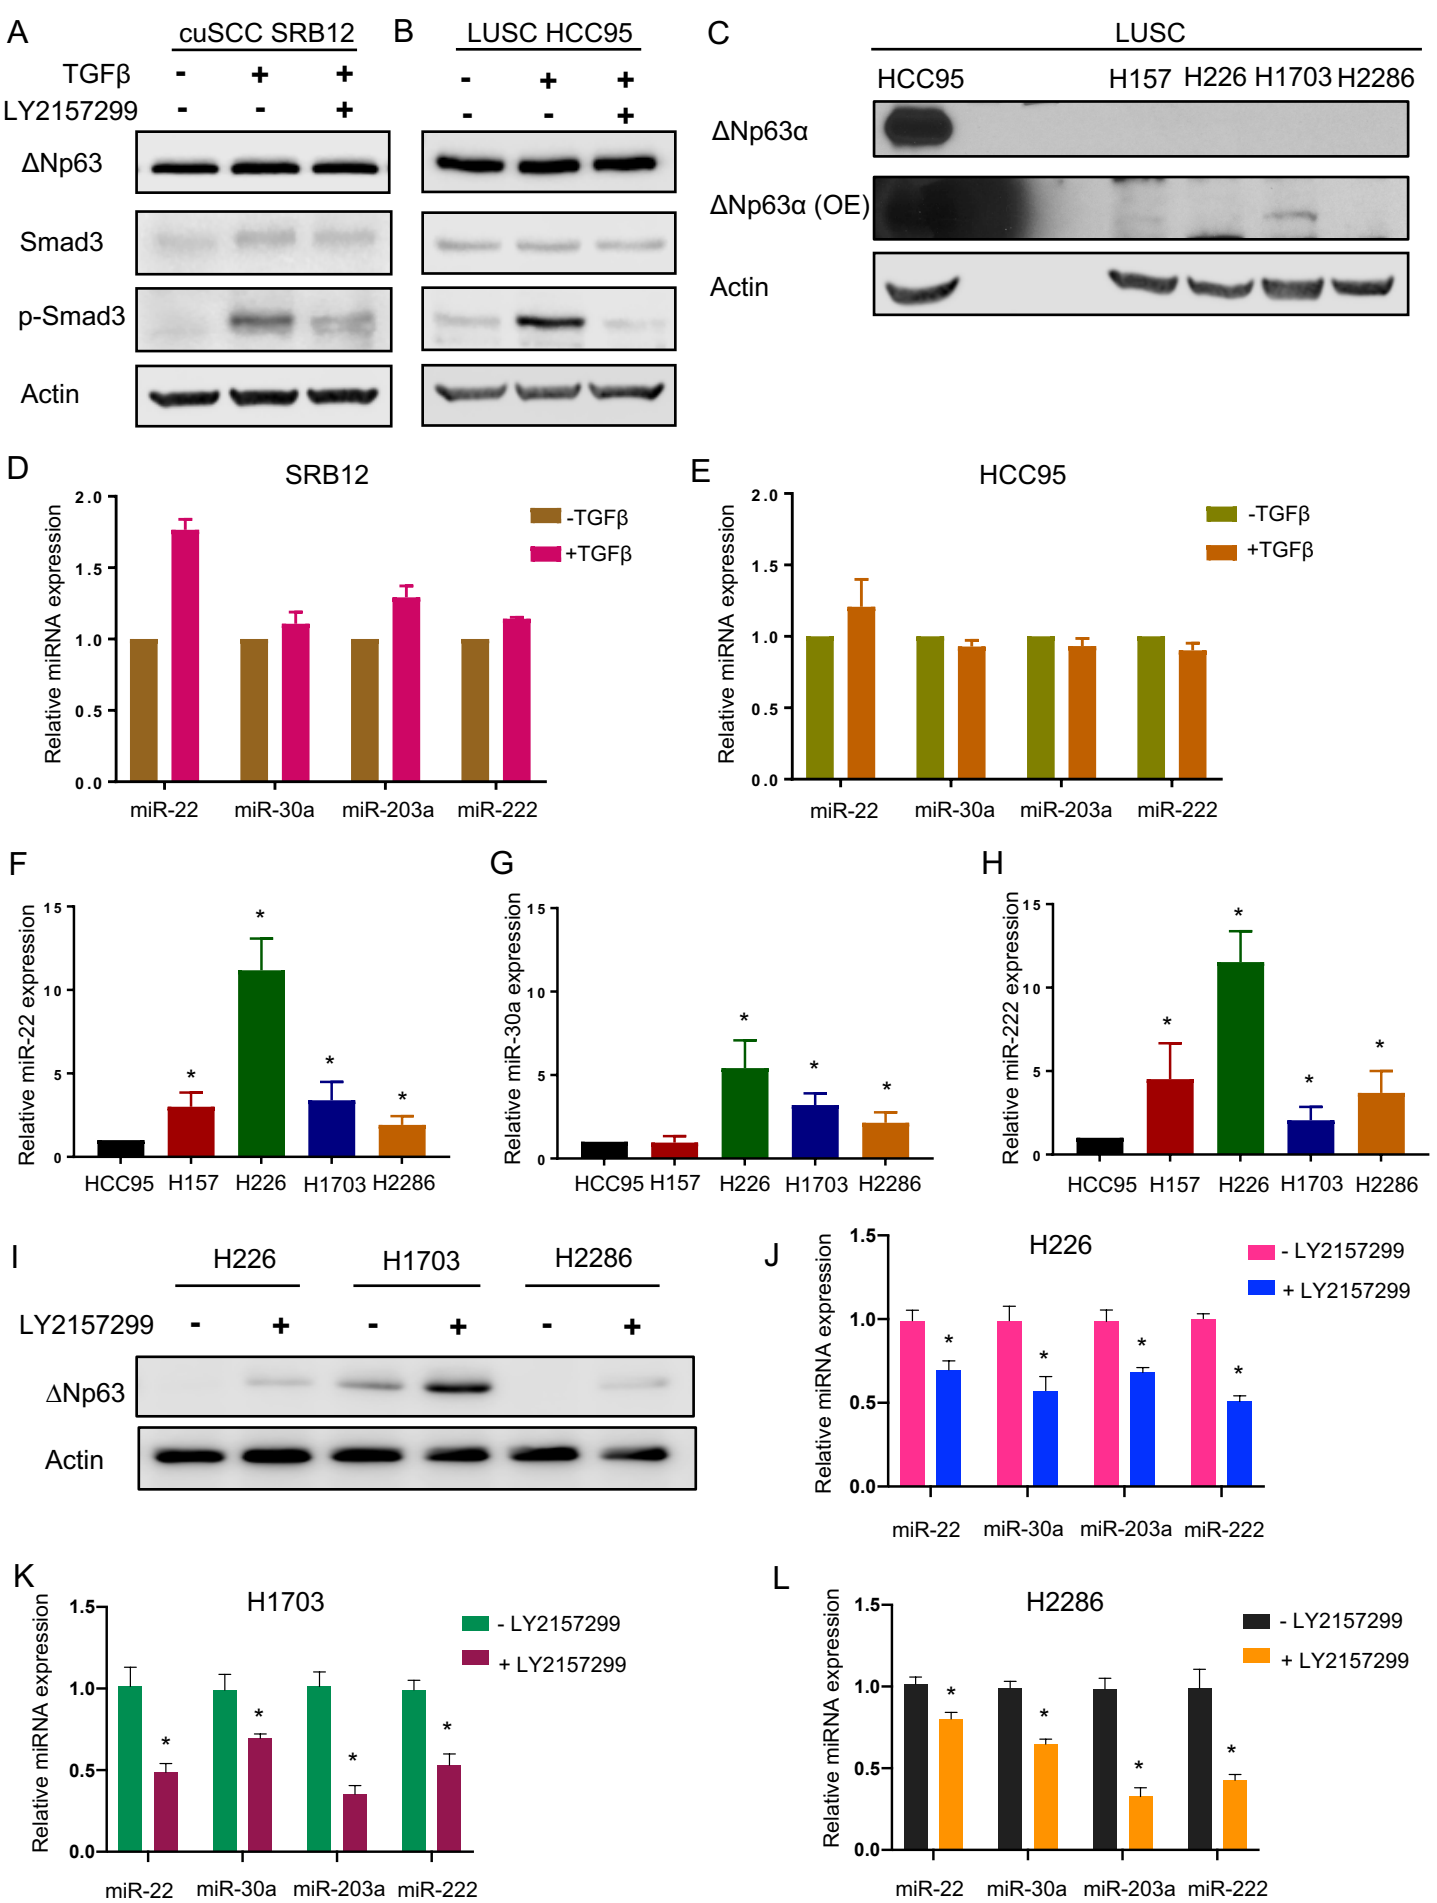

Supplement: NIHMS1587100-supplement-11.pdf [file NIHMS1587100-supplement-11.pdf]

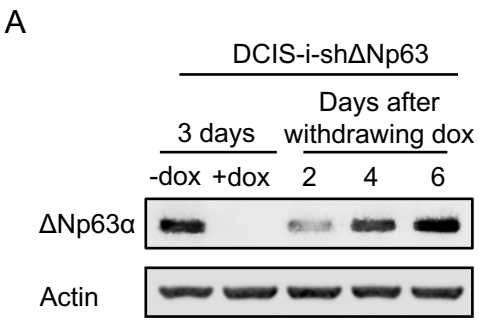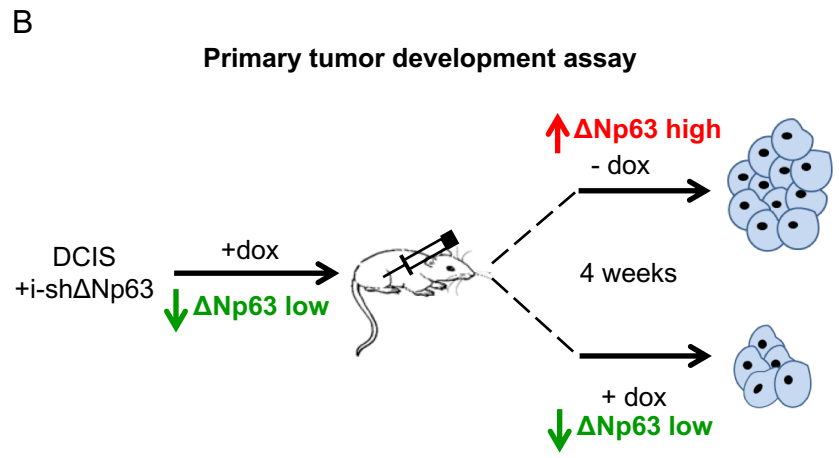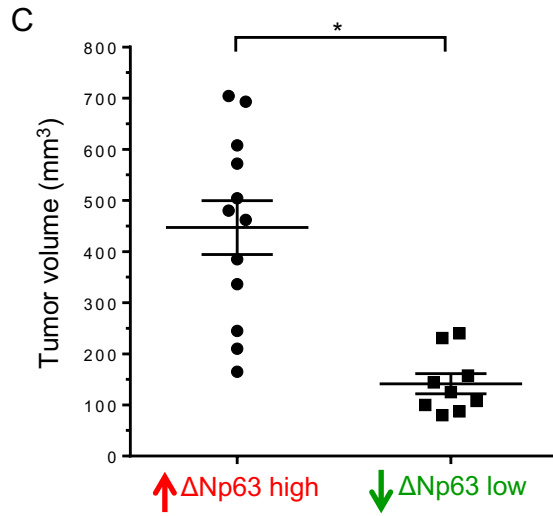

Supplement: NIHMS1587100-supplement-6.pdf [file NIHMS1587100-supplement-6.pdf]

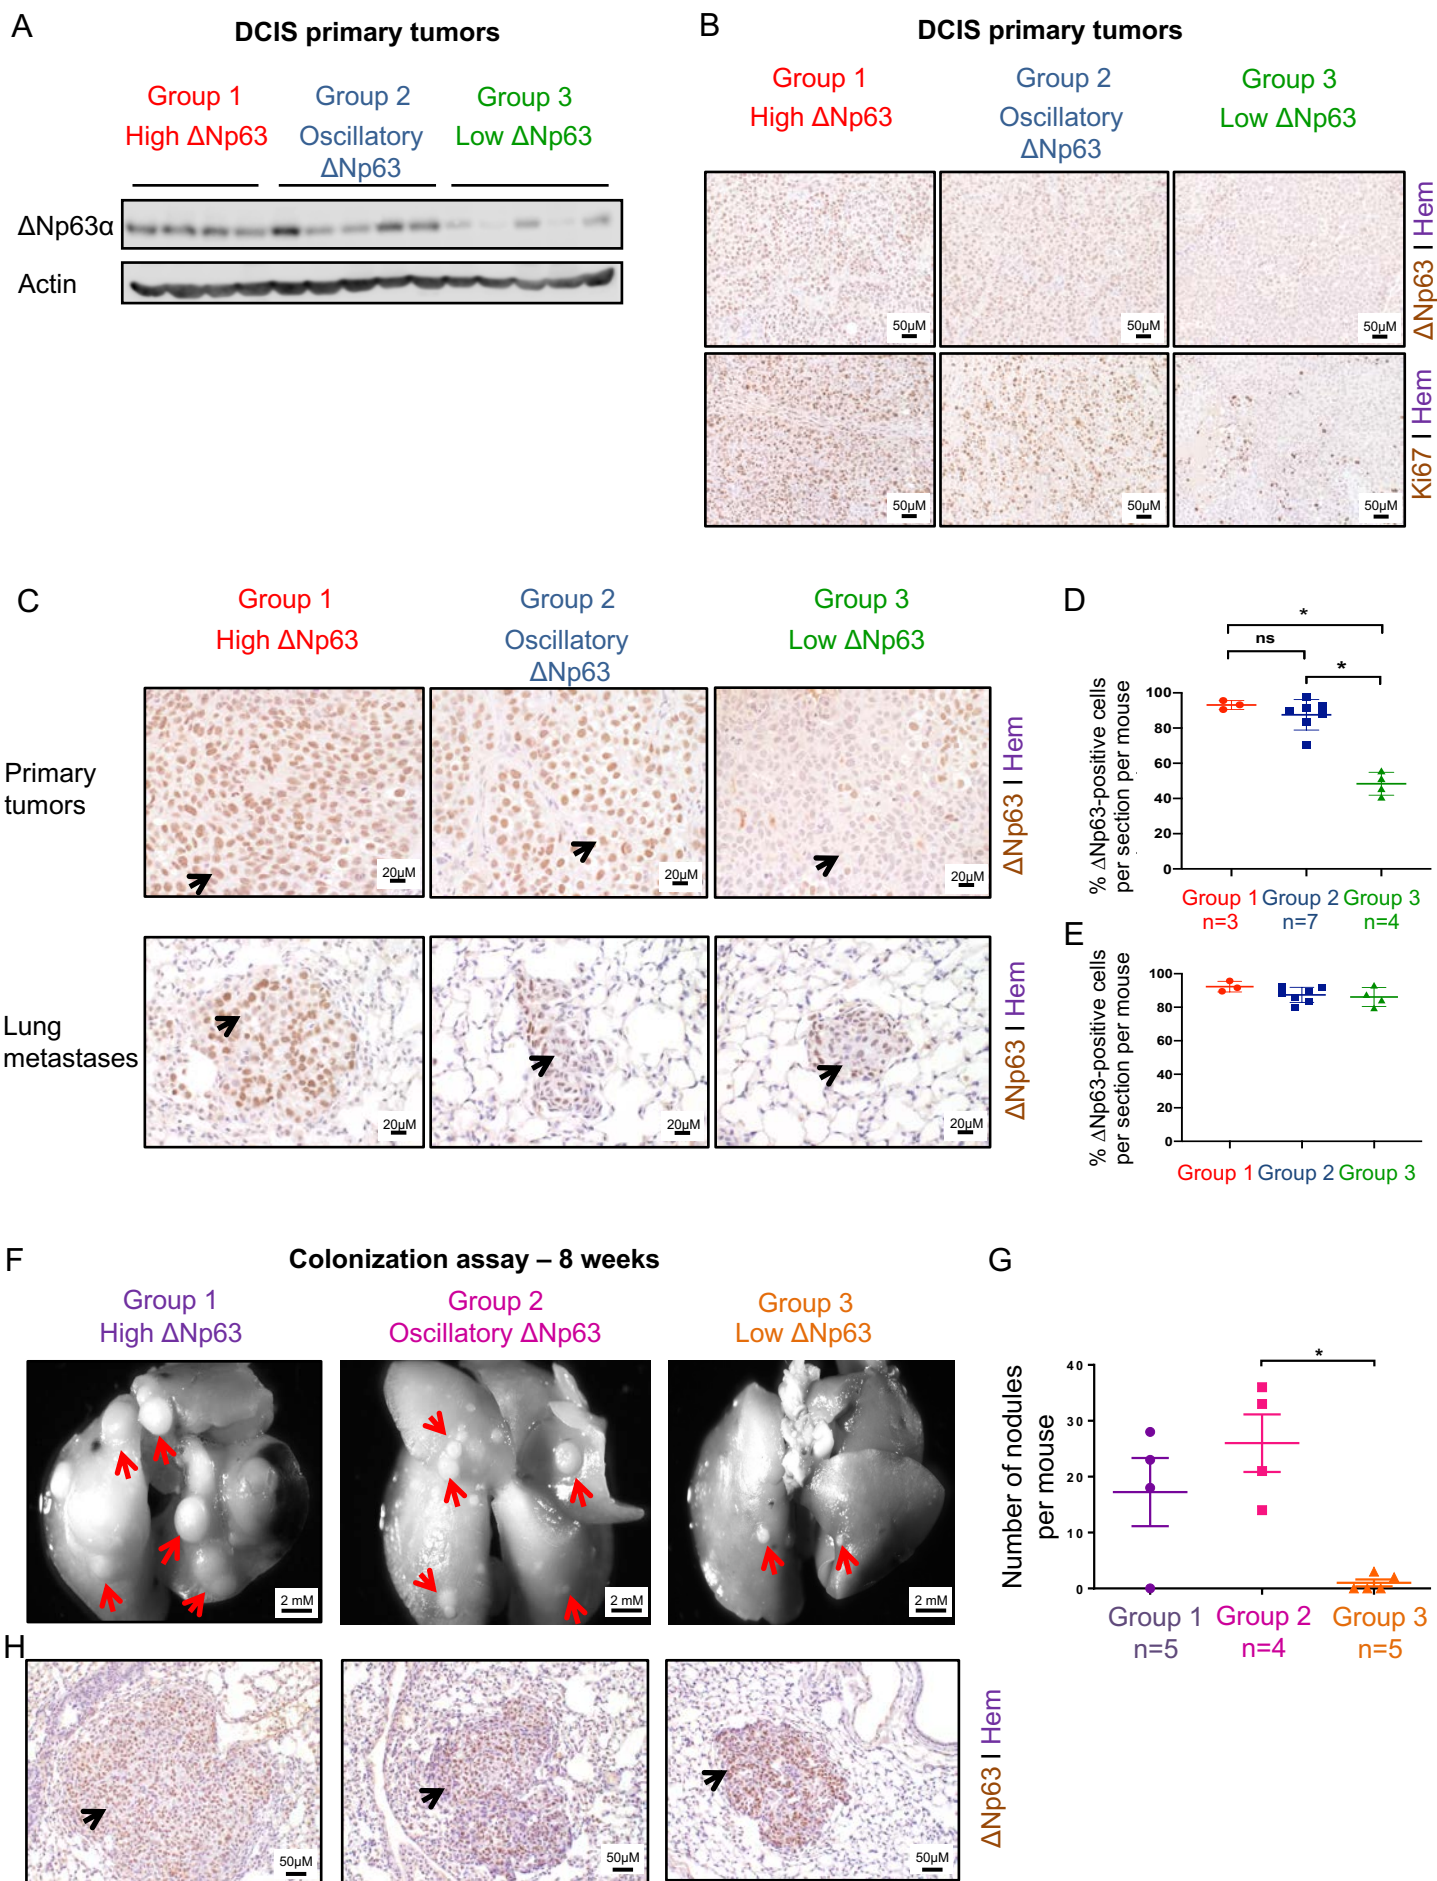

Supplement: NIHMS1587100-supplement-7.pdf [file NIHMS1587100-supplement-7.pdf]

A

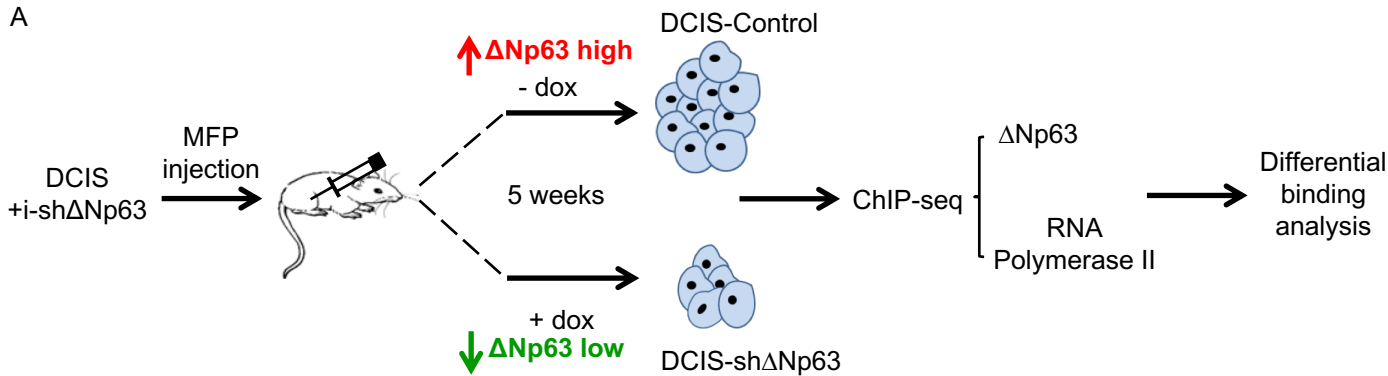

B

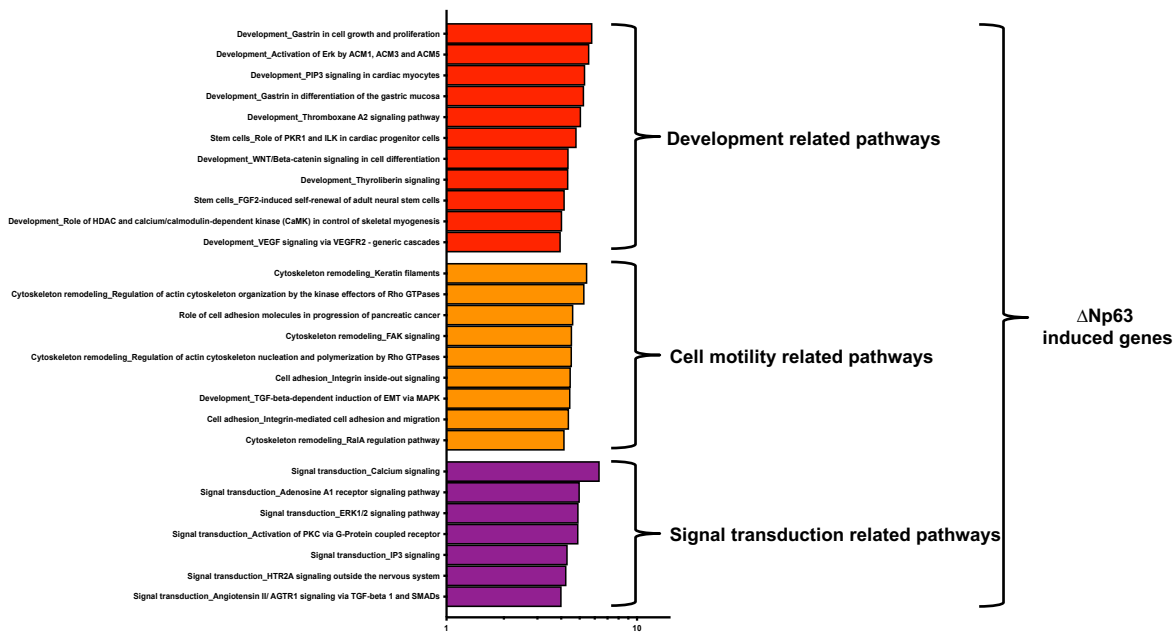

C

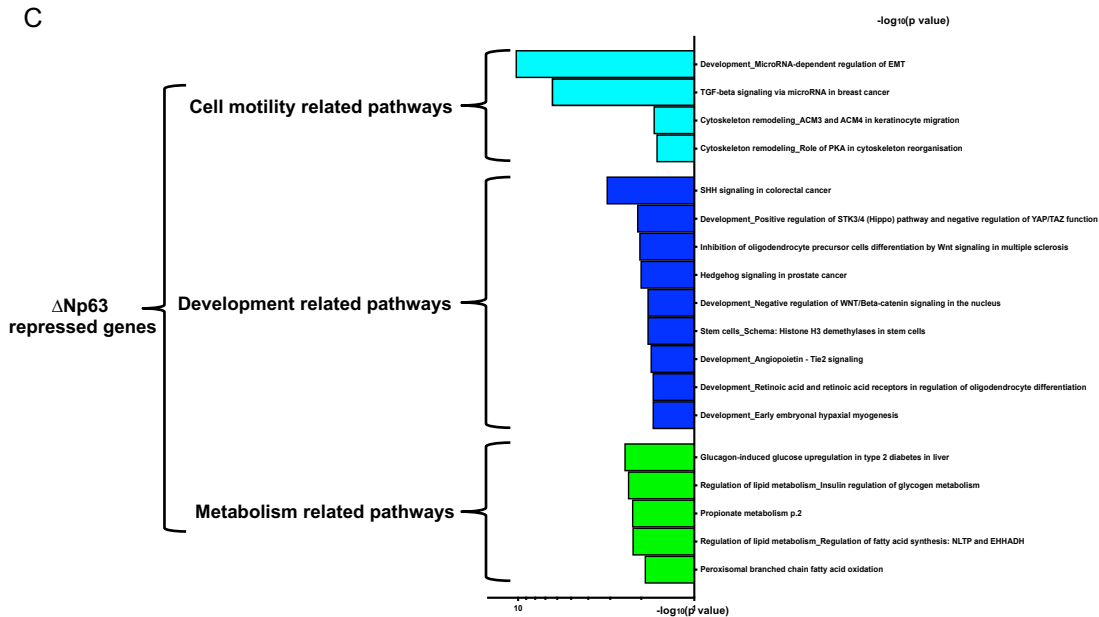

Supplement: NIHMS1587100-supplement-8.pdf [file NIHMS1587100-supplement-8.pdf]

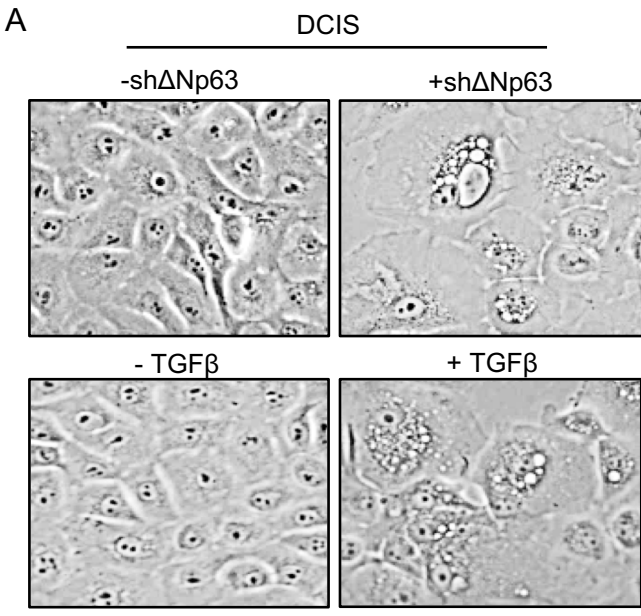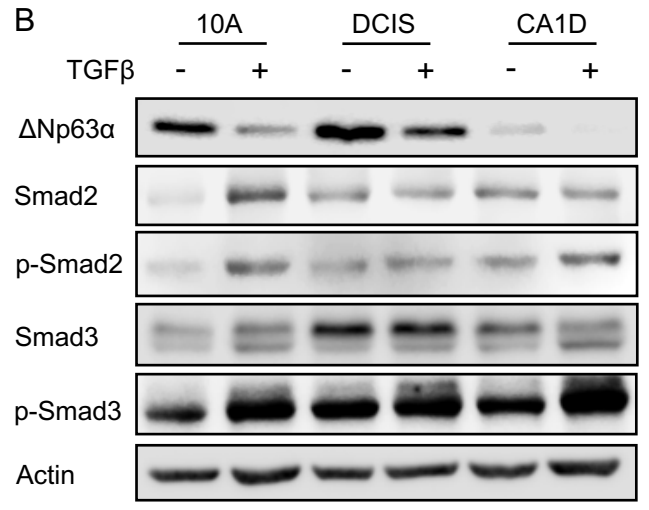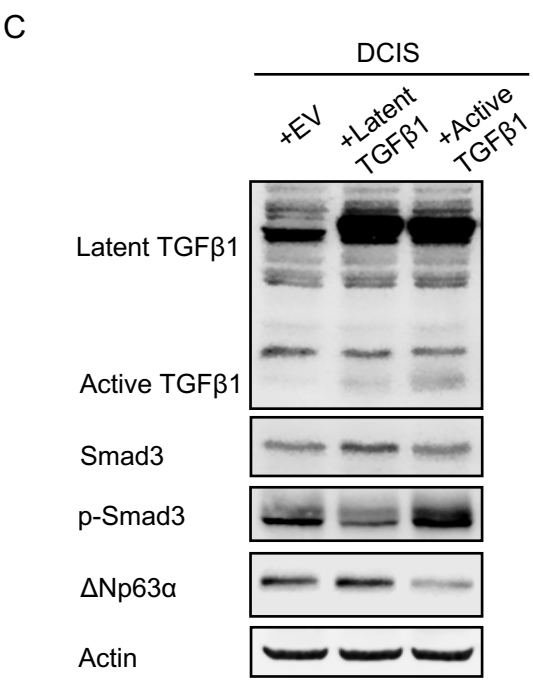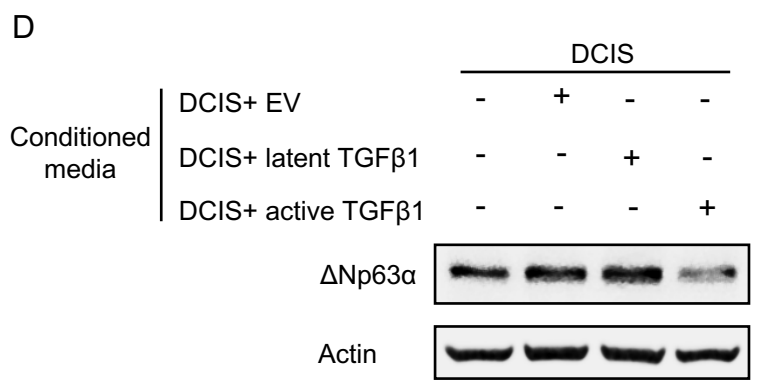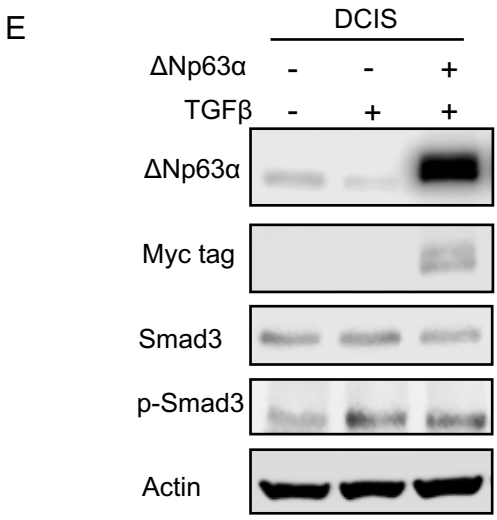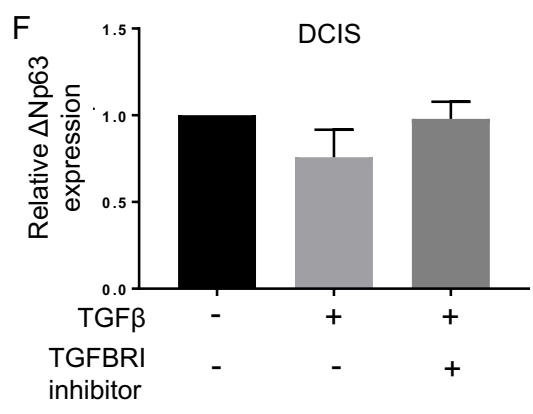

Supplement: NIHMS1587100-supplement-9.pdf [file NIHMS1587100-supplement-9.pdf]
